# Supplementary material for: Construction of a photochemical reactor combining a CCD spectrophotometer and a LED radiation source
Source: Royal Society of Chemistry journal article supplement (doi:10.1039/c2pp25166c), 2012-06-19
Supplement: c2pp25166c.pdf [file c2pp25166c.pdf]

*Supporting information for*

**Construction of a photochemical reactor combining a CCD spectrophotometer and a  
LED radiation source**

Melinda Gombár,<sup>a</sup> Éva Józsa,<sup>a</sup> Mihály Braun,<sup>b</sup> Katalin Ósz<sup>a\*</sup>

<sup>a</sup> Department of Physical Chemistry, University of Debrecen, Debrecen, Hungary.

<sup>b</sup> Department of Inorganic and Analytical Chemistry, University of Debrecen, Debrecen,  
Hungary.

\* Corresponding author. Fax: + 36 52 512-915; Tel: + 36 52-512-900 Ext.: 22387; E-mail:  
osz.katalin@science.unideb.hu

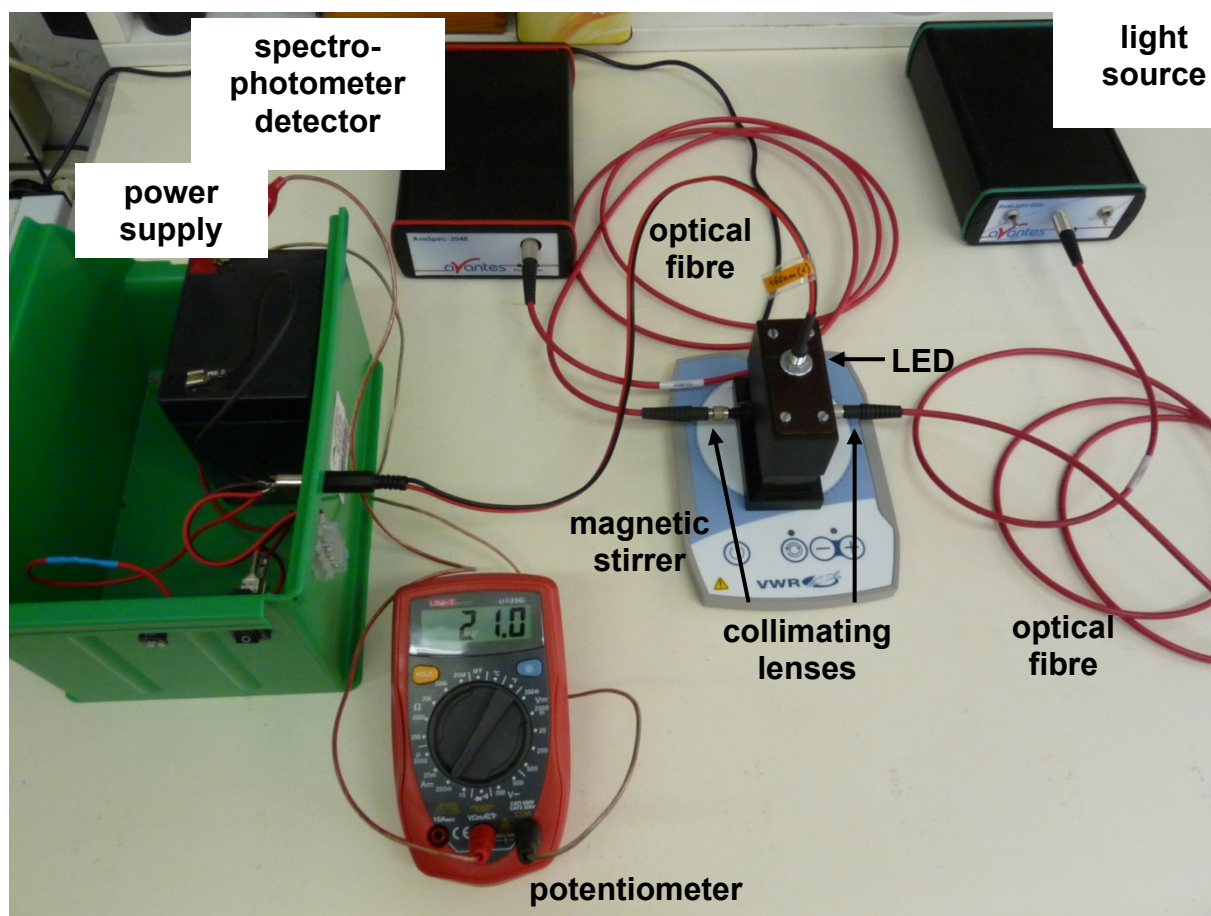

**Figure S1** Measurement setup for the analogue photoreactor arrangement

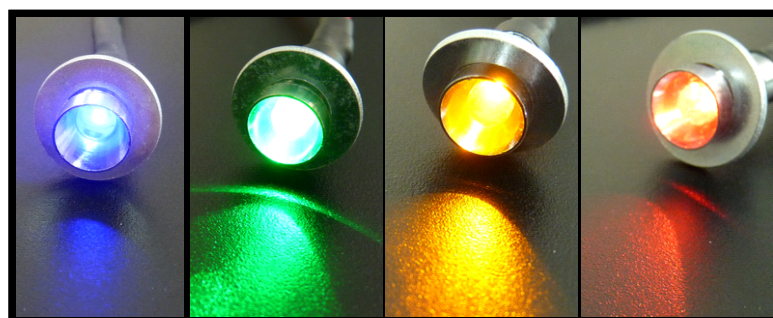

**Figure S2** Different color monochromatic LED light sources: LED<sub>460</sub>, LED<sub>522</sub>, LED<sub>595</sub> and LED<sub>635</sub>

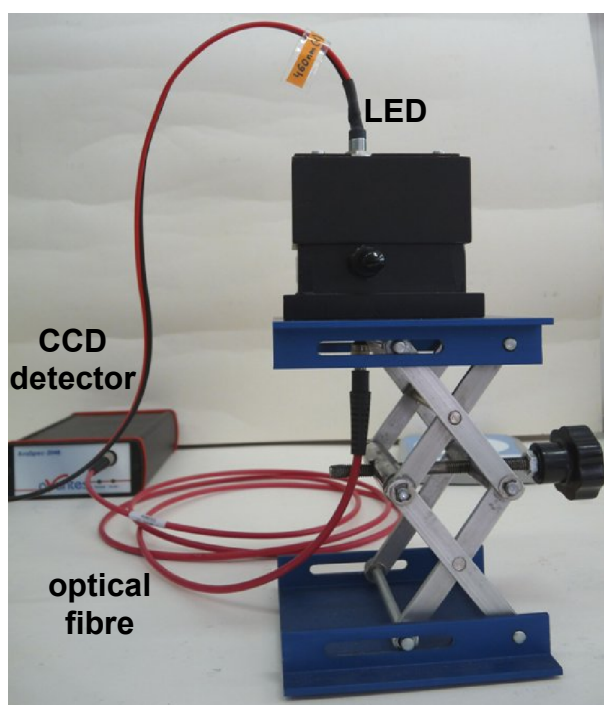

**Figure S3** Measurement setup to investigate the spectral properties of the LED light sources

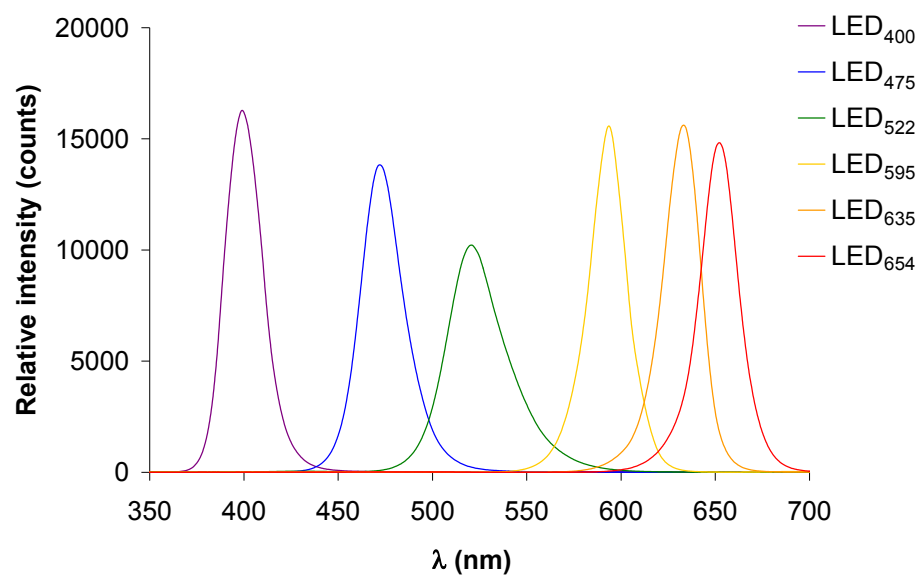

**Figure S4** Spectra of monochromatic LED light sources

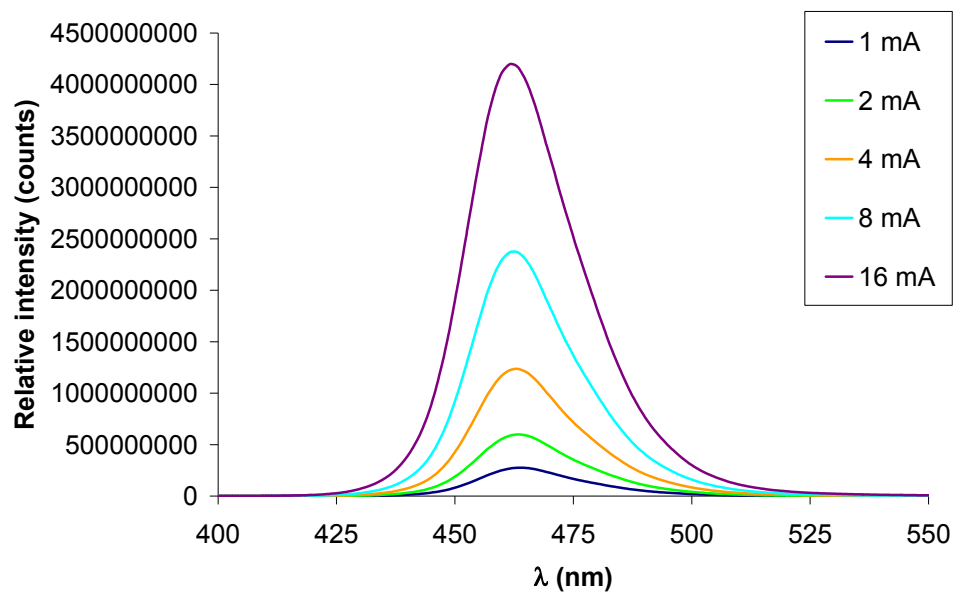

**Figure S5** Spectra of LED<sub>475</sub> at different current strength values

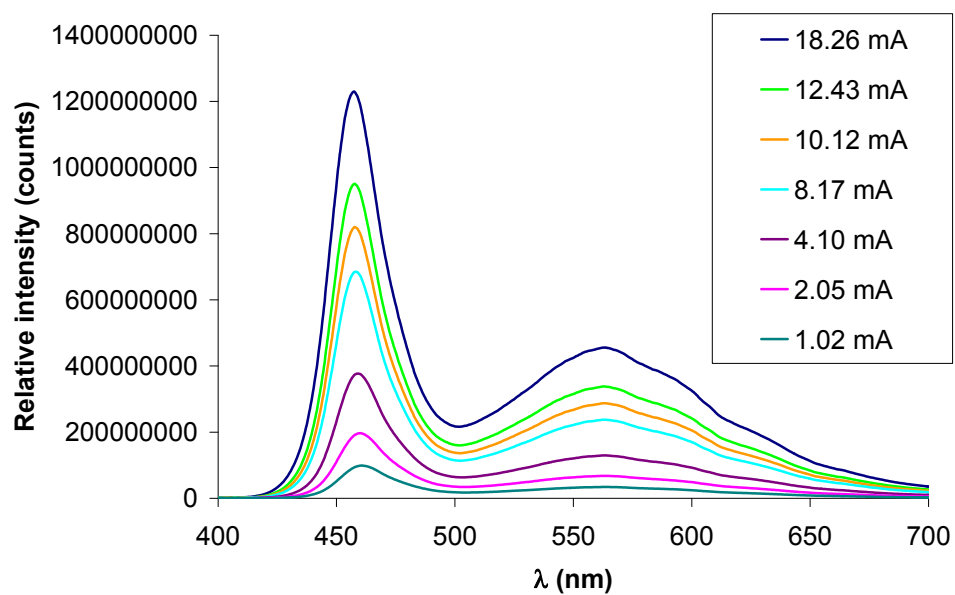

**Figure S6** Spectra of white LED at different current strength values

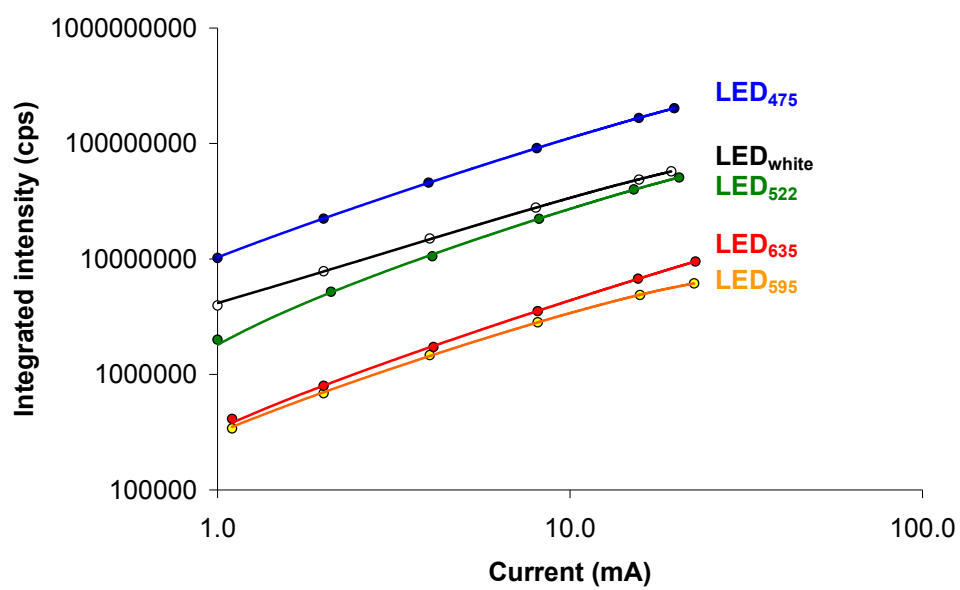

**Figure S7** Dependence of integrated intensity on current strength

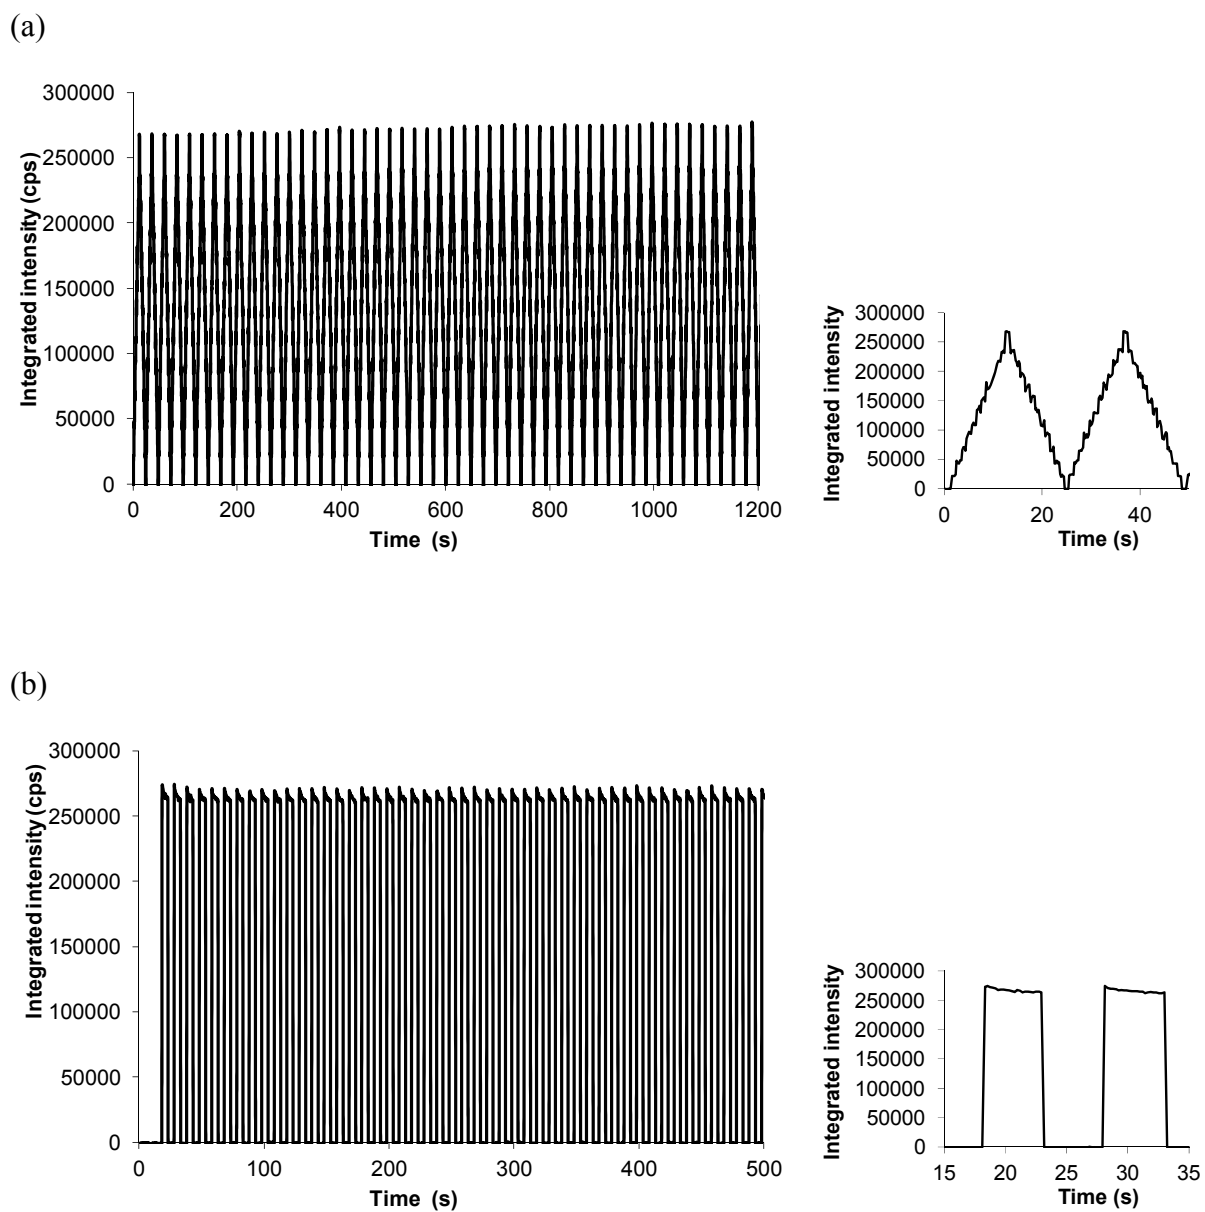

**Figure S8** Some of the possible illumination schemes for the photoreactor using LED<sub>400</sub>: saw-tooth (a) and interrupted illumination (b)

### **Derivation of equations 1 and 2:**

The photon flow of the lamp is  $q_{n,p}$ , the detected initial absorbance of the solution at the wavelength of illumination is  $A_{\Phi}^{ini}$ . The optical path length of illumination is larger by a factor of  $\beta$  than the optical path length for illumination, therefore the absorbed part of the photon flow is:

$$q_{n,p} \left( 1 - 10^{-\beta A_{\Phi}^{ini}} \right) \quad (S1)$$

If the quantum yield of the process is  $\Phi$ , then the initial rate of the photochemical process is (keeping in mind that the rate is given as an intensive quantity in terms of concentrations):

$$v_{ini} = \frac{\Phi q_{n,p}}{V} \left( 1 - 10^{-\beta A_{\Phi}^{ini}} \right) \quad (S2)$$

The stoichiometry of the studied process does not change over time, so the absorbance change reflects the progress of the reaction in a linear fashion. This means that the initial rate of the reaction can be directly determined from the initial rate of absorbance change at the wavelength of monitoring:

$$v_{ini} = \frac{dA_{\lambda}}{dt} \frac{c_0}{(A_{\lambda}^{fin} - A_{\lambda}^{ini})} \quad (S3)$$

Equation S4 follows from a combination and re-arrangement of equations S2 and S3:

$$\Phi = \frac{dA_{\lambda}}{dt} \frac{c_0 V}{(A_{\lambda}^{fin} - A_{\lambda}^{ini}) q_{n,p}} \left( 1 - 10^{-\beta A_{\Phi}^{ini}} \right)^{-1} \quad (S4)$$

Equation 2 simply follows from the fact that the absorbance changes with the concentration of the absorbing species in a directly proportional manner and that the stoichiometry of the studied process does not change over time.

$$A_{\lambda} = (1 - \zeta)A_{\lambda}^{ini} + \zeta A_{\lambda}^{fin} \quad (2)$$

In effect, this equation states that the reaction coordinate can be calculated from the absorbance values in a linear fashion. The absorbance at the wavelength of illumination can be calculated in a very similar manner:

$$A_{\Phi} = (1 - \zeta)A_{\Phi}^{ini} + \zeta A_{\Phi}^{fin} \quad (S5)$$

The part of the photon flow absorbed by the reactant at the wavelength of illumination is given as:

$$q_{n,p} \left( 1 - 10^{-(1-\zeta)\beta A_{\Phi}^{ini} - \zeta\beta A_{\Phi}^{fin}} \right) \frac{(1 - \zeta)A_{\Phi}^{ini}}{(1 - \zeta)A_{\Phi}^{ini} + \zeta A_{\Phi}^{fin}} \quad (S6)$$

Therefore, the rate of reactant loss at any time instant is:

$$v = \frac{q_{n,p}\Phi}{V} \left( 1 - 10^{-(1-\zeta)\beta A_{\Phi}^{ini} - \zeta\beta A_{\Phi}^{fin}} \right) \frac{(1 - \zeta)A_{\Phi}^{ini}}{(1 - \zeta)A_{\Phi}^{ini} + \zeta A_{\Phi}^{fin}} \quad (S7)$$

The definition of the reaction coordinate ensures that the rate of reactant loss is connected to the first derivative of the reaction coordinate through the following equation:

$$v = c_0 \frac{d\zeta}{dt} \quad (S8)$$

A comparison of equations S7 and S8 yields equation 1 in the main text.
